# Supplementary material for: Comparison of COVID-19 and Non-COVID-19 Pneumonia in Down Syndrome
Source: MDPI journal article supplement (doi:10.3390/jcm10163748), 2021-08-23
Supplement: s1 [file s1]

SUPPLEMENTARY MATERIAL

**Figure S1.** Age distribution of COVID-19 DS patients by survey group. (cases reported by clinicians are depicted in red and those reported by families are shown in blue)

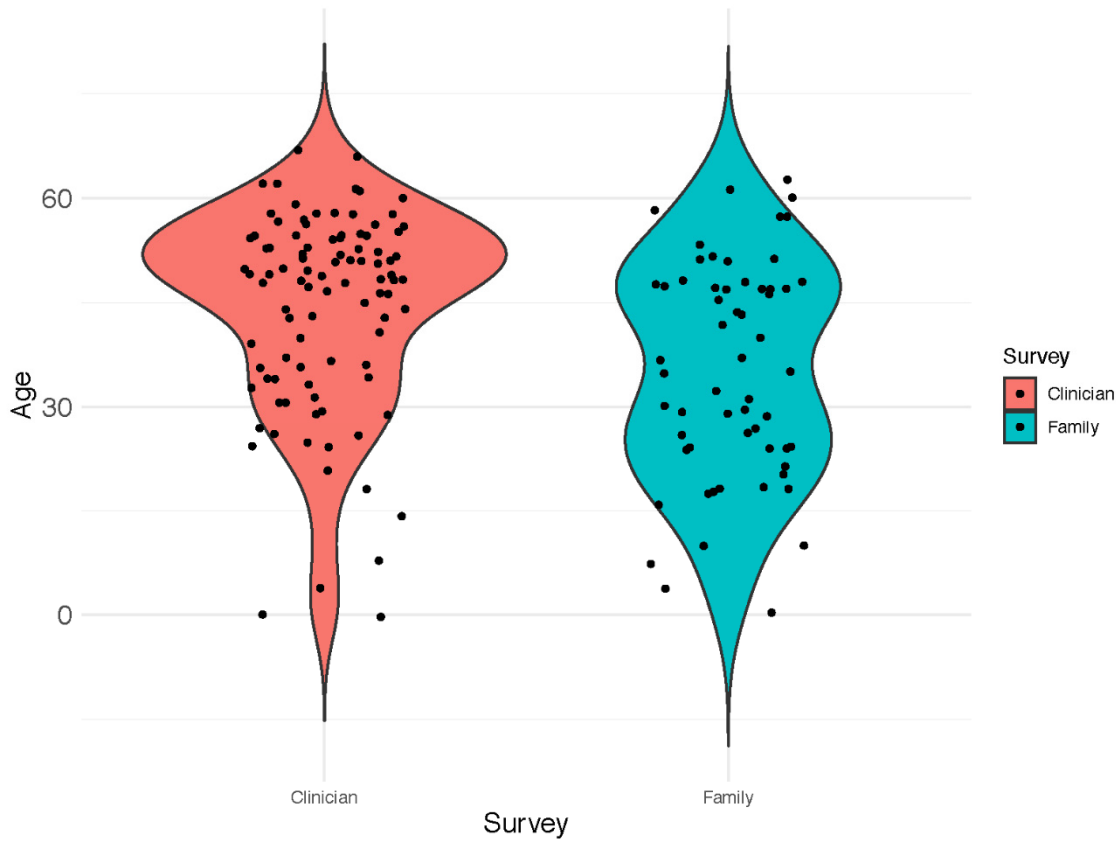

**Figure S2.** Clinical signs and symptoms of Spanish individuals with DS and COVID-19. Results are expressed as absolute frequencies (%). For details see Supplementary Table 1.

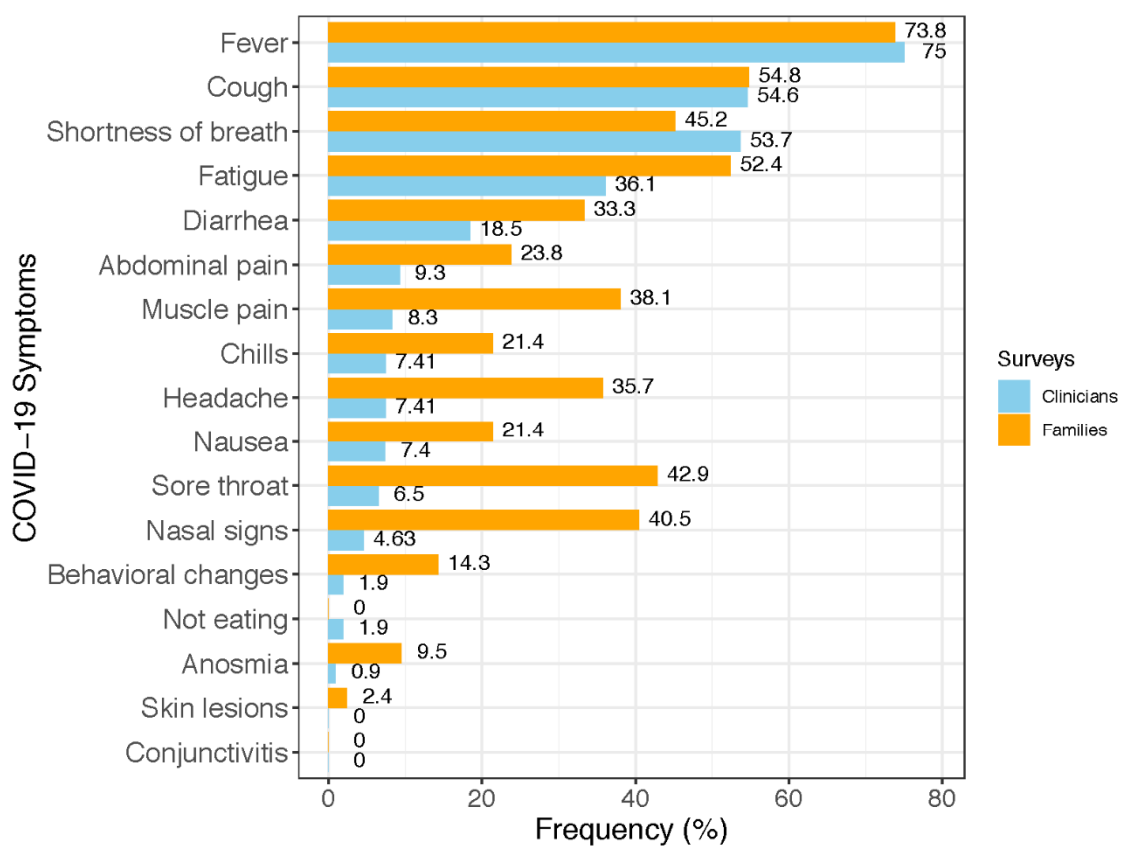

**Figure S3.** Most frequent symptoms in Spanish individuals with DS admitted to the hospital due to COVID-19. Data are represented as frequencies (percentages)

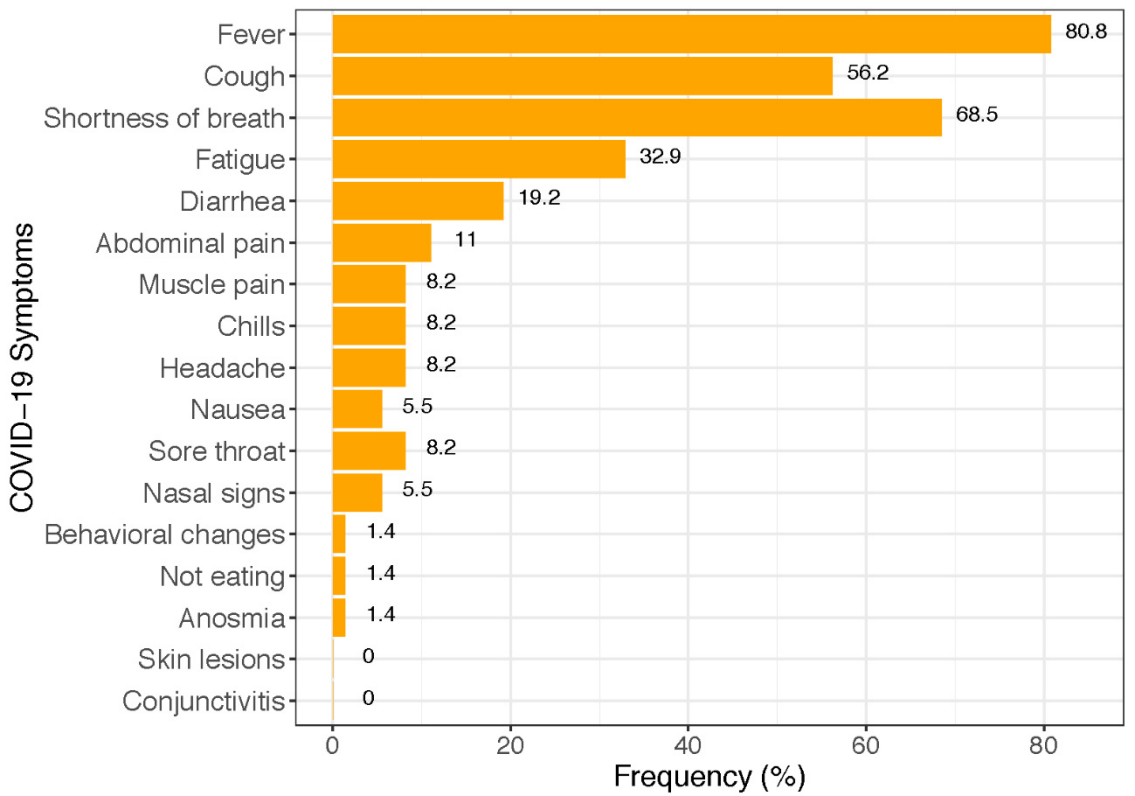

**Figure S4.** Distribution of hospitalization length of stay for individuals with DS with non-COVID-19 pneumoniae (CMBD cohort) according to age and outcome.

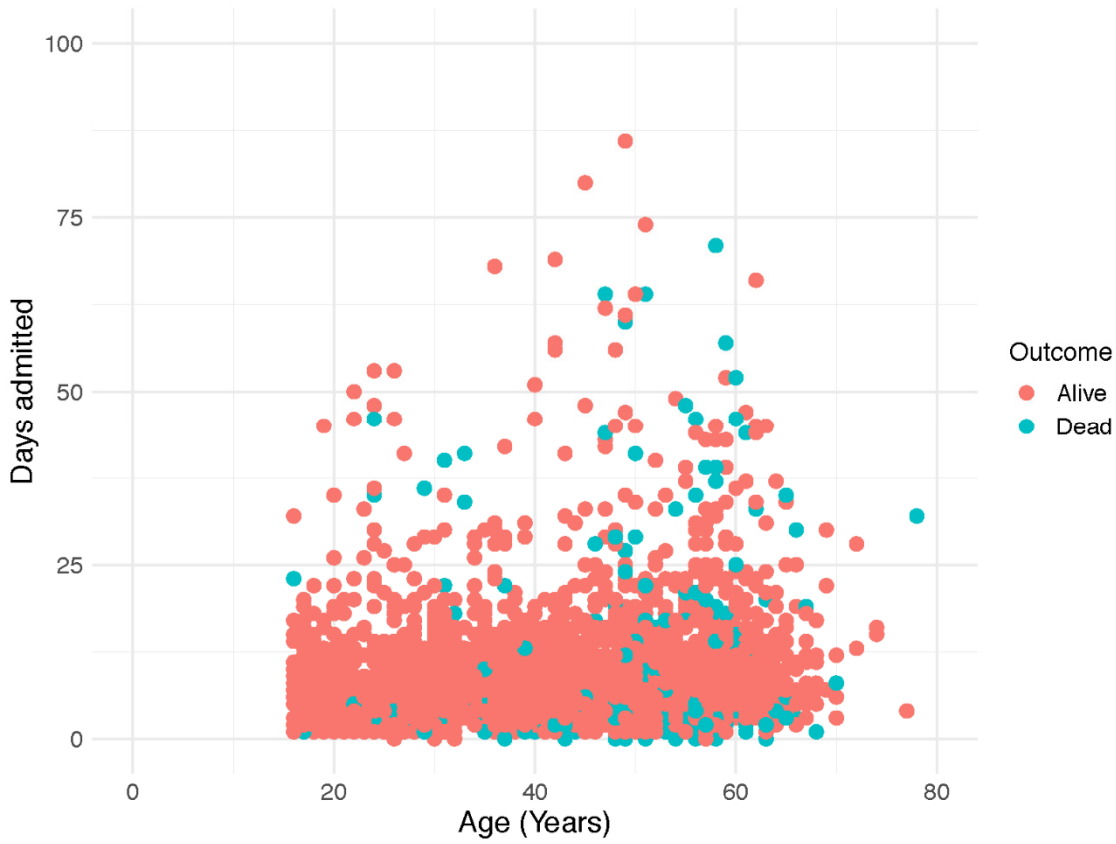

**Table S1. Socio-demographic characteristics of T21RS Spanish DS COVID-19 patients grouped by data source (reported by families or clinicians)**

| <b>Demographics</b>                   | <b>Total<br/>n = 150</b> | <b>Family surveys<br/>n = 42</b> | <b>Clinician surveys<br/>n = 108</b> | <b>p</b> |
|---------------------------------------|--------------------------|----------------------------------|--------------------------------------|----------|
| Age (years) mean (SD)                 | 41.7 ± 15.6              | 33.5 ± 16.5                      | 44.8 ± 14.1                          | <0.001*  |
| Gender (men)                          | 81 (54)                  | 20 (47.6)                        | 61 (56.5)                            | 0.46**   |
| Type of trisomy                       |                          |                                  |                                      |          |
| Full/standard                         | 91 (60.7)                | 31 (73.8)                        | 60 (55.6)                            | 1**      |
| Mosaic                                | 3 (2)                    | 1 (2.4)                          | 2 (1.8)                              |          |
| Intellectual Disability               |                          |                                  |                                      |          |
| Borderline/Mild                       | 22 (14.7)                | 9 (21.4)                         | 13 (12)                              | 0.21**   |
| Moderate/Severe                       | 103 (68.7)               | 28 (66.7)                        | 75 (69.4)                            |          |
| Living in a residential care facility | 61/145 (42.1)            | 12/42 (28.6)                     | 49/103 (47.6)                        | <0.05**  |

Results are presented as mean ± SD or n (%). \*Student's t test \*\* Chi square test

**Table S2. Relevant clinical comorbidities of T21RS Spanish DS patients with COVID-19 T21RS grouped by data source (reported by families or clinicians)**

| Comorbidities              | Total<br>n (%) | Family surveys<br>n (%) | Clinician surveys n<br>(%) | $\chi^2$ (p) |
|----------------------------|----------------|-------------------------|----------------------------|--------------|
| Congenital heart defect    | 37/140 (26.4)  | 14/41 (34.2)            | 23/99 (23.2)               | 0.21         |
| Psychiatric conditions     | 51/141 (36.2)  | 6/40 (15)               | 45/101 (44.6)              | < 0.001      |
| Autism                     | 3/150 (2)      | 2/42 (4.8)              | 1/108 (0.9)                | 0.19         |
| Depression                 | 6/150 (4)      | 0/42 (0)                | 6/108 (5.6)                | 0.19         |
| Behavioural problems       | 30/150 (20)    | 1/42 (2.4)              | 29/108 (26.9)              | < 0.001      |
| Alzheimer's disease        | 34/134 (25.4)  | 1/34 (2.9)              | 33/100 (33)                | < 0.001      |
| Thyroid disorder           | 61/135 (45.2)  | 13/35 (37.1)            | 48/100 (48)                | 0.33         |
| Seizures/epilepsy          | 23/138 (16.7)  | 4/34 (11.8)             | 19/104 (18.3)              | 0.44         |
| Blood cancer               | 2/138 (1.4)    | 0/33 (0)                | 2/105 (1.9)                | 1            |
| Obstructive sleep apnoea   | 31/126 (24.6)  | 7/32 (21.9)             | 24/94 (25.5)               | 0.81         |
| Obesity                    | 32/124 (25.8)  | 11/36 (30.6)            | 21/88 (23.9)               | 0.5          |
| Hypertension               | 1/134 (0.7)    | 0/33 (0)                | 1/101 (1)                  | 1            |
| Coronary heart disease     | 4/134 (3)      | 2/34 (5.9)              | 2/100 (2)                  | 0.26         |
| Diabetes mellitus          | 5/134 (3.7)    | 0/34 (0)                | 5/100 (5)                  | 0.33         |
| Chronic lung disease       | 12/133 (9)     | 1/33 (3)                | 11/100 (11)                | 0.29         |
| Gastrointestinal disorders | 27/136 (19.8)  | 7/32 (21.9)             | 20/104 (19.2)              | 0.8          |

Results are presented as n (%). Denominators in each category may vary from total group sample, since missing data (not responded or "not known") in survey responses were removed from the analysis.

**Table S3.** Detailed description of clinical signs and symptoms of Spanish individuals with DS and COVID-19

| Symptoms n (%)      | Clinicians (n = 108) | Families (n = 42) | $\chi^2$ (p) |
|---------------------|----------------------|-------------------|--------------|
| Fever               | 81 (75)              | 31 (73.9)         | 1            |
| Cough               | 59 (54.6)            | 23 (54.8)         | 1            |
| Shortness of breath | 58 (53.7)            | 19 (45.2)         | 0.37         |
| Fatigue             | 39 (36.1)            | 22 (52.4)         | 0.09         |
| Diarrhoea           | 20 (18.5)            | 14 (33.3)         | 0.08         |
| Abdominal pain      | 10 (9.3)             | 10 (23.8)         | 0.03         |
| Muscle pain         | 9 (9.3)              | 16 (38.1)         | < 0.001      |
| Chills              | 8 (7.4)              | 9 (21.4)          | 0.02         |
| Headache            | 8 (7.4)              | 15 (37.7)         | <0.001       |
| Nausea              | 8 (7.4)              | 9 (21.4)          | 0.02         |
| Sore throat         | 7 (6.5)              | 18 (42.9)         | <0.001       |
| Nasal signs         | 5 (4.6)              | 17 (40.5)         | <0.001       |
| Behavioural changes | 2 (1.8)              | 6 (14.3)          | <0.01        |
| Not eating          | 2 (1.8)              | 0 (0)             | 1            |
| Anosmia             | 1 (0.9)              | 4 (9.5)           | 0.02         |
| Skin lesions        | 0 (0)                | 1 (2.4)           | 1            |
| Conjunctivitis      | 0 (0)                | 0 (0)             | 1            |
| Other               | 15 (13.9)            | 4 (9.5)           | 0.59         |

Results are presented as n (%).

**Table S4.** Treatments received by admitted patients with DS and COVID-19

| Treatments            | Frequency n (%)<br>N=73 |
|-----------------------|-------------------------|
| Glucocorticoids       | 26 (35.6)               |
| Hydroxychloroquine    | 53 (72.6)               |
| Chloroquine           | 2 (2.7)                 |
| Azithromycin          | 36 (49.3)               |
| Tocilizumab           | 4 (5.5)                 |
| Melatonin             | 0 (0)                   |
| Colchicine            | 0 (0)                   |
| Antifungal medication | 1 (1.4)                 |
| Immune globulin       | 0 (0)                   |
| Oxygen                | 60 (82.2)               |

The denominator in this analysis (n=73) is lower than the reported total group sample (n=86), since missing data (not responded or “not known”) in survey responses were removed from the analysis. Results are presented as n (%).



**Table S5a.** Comorbidities of CMBD cohort with pneumonia.

| Comorbidity         | Total<br>n | Alive<br>n (%) | Dead<br>n (%) |
|---------------------|------------|----------------|---------------|
| Alzheimer's disease |            |                |               |
| 16-40               | 2          | 2 (100)        | 0 (0)         |
| >40                 | 149        | 119 (79.8)     | 30 (20.1)     |
| Obesity             |            |                |               |
| 16-40               | 135        | 125 (92.6)     | 10 (7.4)      |
| >40                 | 108        | 99 (91.7)      | 9 (8.3)       |
| Epilepsy            |            |                |               |
| 16-40               | 97         | 85 (87.6)      | 12 (12.3)     |
| >40                 | 291        | 246 (84.5)     | 45 (15.5)     |

**Table S5b.** Comorbidities of Spanish DS COVID-19 patients.

| Comorbidity         | Total<br>n | Alive<br>n (%) | Dead<br>n (%) |
|---------------------|------------|----------------|---------------|
| Alzheimer's disease |            |                |               |
| 16-40               | 0          | 0              | 0             |
| >40                 | 22         | 8 (36.4)       | 14 (63.6)     |
| Obesity             |            |                |               |
| 16-40               | 9          | 9 (100)        | 0 (0)         |
| >40                 | 13         | 8 (61.5)       | 5 (38.5)      |
| Epilepsy            |            |                |               |
| 16-40               | 1          | 1 (100)        | 0 (0)         |
| >40                 | 8          | 1 (12.5)       | 7 (87.5)      |

**Table S6.** In-hospital mortality of Spanish DS COVID-19 and non-COVID-19 pneumonias patients

| DS COVID-19 patients |            |                |               | Non-COVID-19 pneumonias |                |               |
|----------------------|------------|----------------|---------------|-------------------------|----------------|---------------|
| Age groups           | Total<br>n | Alive<br>n (%) | Dead<br>n (%) | Total<br>n              | Alive<br>n (%) | Dead<br>n (%) |
| 16-40                | 23         | 23 (100)       | 0 (0)         | 1244                    | 1185 (95.3)    | 59 (4.7)      |
| >40                  | 62         | 39 (62.9)      | 23 (30.1)     | 1567                    | 1353 (86.3)    | 214 (13.7)    |

Results are presented as n or n (%).
